# Supplementary material for: Aggregation-induced emission polydithioacetals with pendant tetraphenylethylene groups for Hg2+ detection and removal
Source: Royal Society of Chemistry journal article supplement (doi:10.1039/d4py00226a), 2024-01-01
Supplement: d4py00226a1.pdf [file d4py00226a1.pdf]

Electronic Supplementary Informations for

**Aggregation-induced emission polydithioacetal with pendant  
tetraphenylethylene groups for Hg<sup>2+</sup> detection and removal**

Yu Gu, Jianjian Zhu, Xinyu Yuan, Siyong Li, Zhongxiang Zhao, and Yanbing Lu\*

Advanced Catalytic Engineering Research Center of the Ministry of Education, College of  
Chemistry and Chemical Engineering, Hunan University, Changsha 410082, P. R. China

***Contents:***

**Figure S1.** GPC trace of polymer PTA-TPE.

**Figure S2.** Photoluminescence spectra of PTA-PTE (10  $\mu\text{M}$ ) in the presence of  $\text{Hg}^{2+}$  and various metal ions in PBS solution.

**Figure S3.** (A) Photoluminescence spectra of PTA-PTE (10  $\mu\text{M}$ ) in the presence of  $\text{Hg}^{2+}$  in PBS (pH 5.0). (B) Photoluminescence spectra of PTA-PTE (10  $\mu\text{M}$ ) in the presence of  $\text{Hg}^{2+}$  and various metal ions in PBS (pH 5.0).

**Figure S4.** (A) Photoluminescence spectra of PTA-PTE (10  $\mu\text{M}$ ) in the presence of  $\text{Hg}^{2+}$  in PBS (pH 9.0). (B) Photoluminescence spectra of PTA-PTE (10  $\mu\text{M}$ ) in the presence of  $\text{Hg}^{2+}$  and various metal ions in PBS (pH 9.0).

**Table S1.** Comparison between various sensing parameters of thioacetal based detection systems.

**Table S2.** The AFS data of PTA-TPE with  $\text{Hg}^{2+}$ .

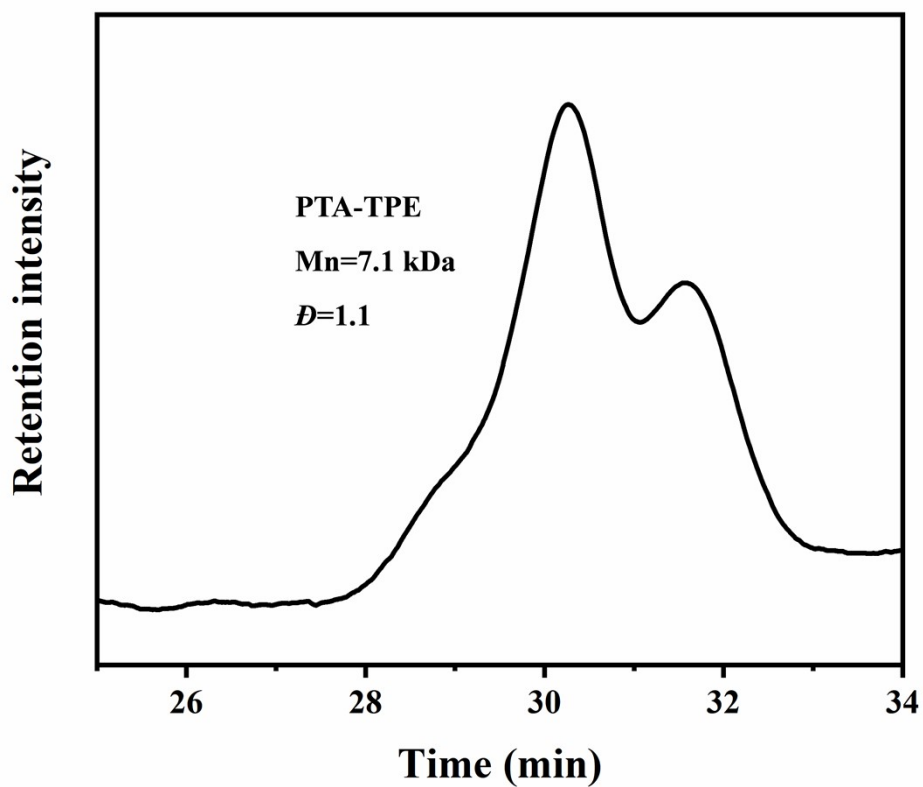

Figure S1. The GPC trace of polymer PTA-TPE.

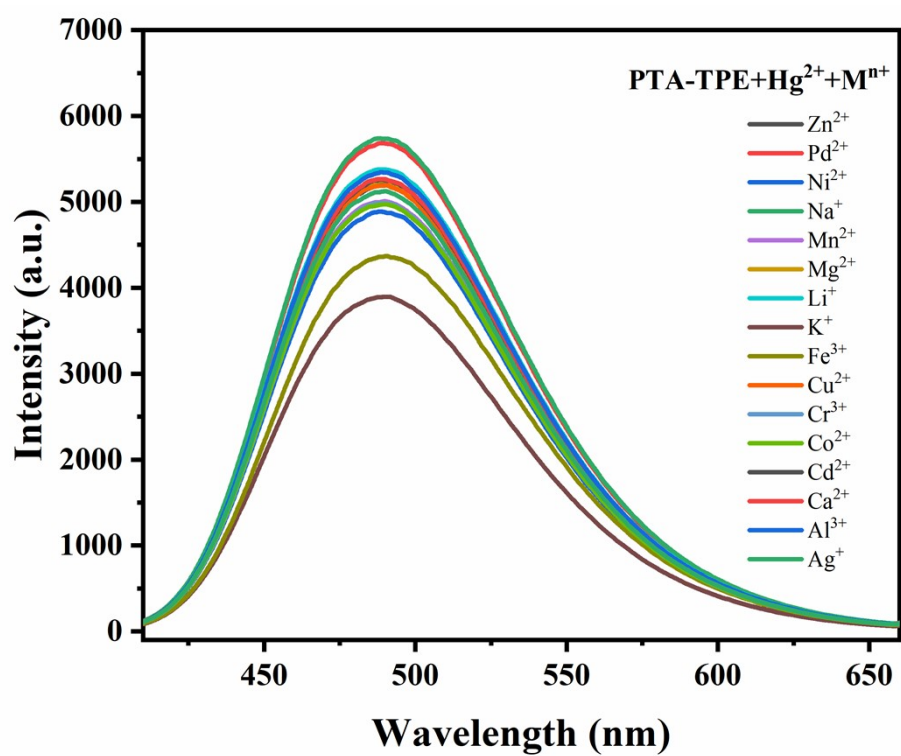

Figure S2. Photoluminescence spectra of PTA-TPE (10  $\mu$ M) in the presence of Hg<sup>2+</sup> and various metal ions in PBS solution.

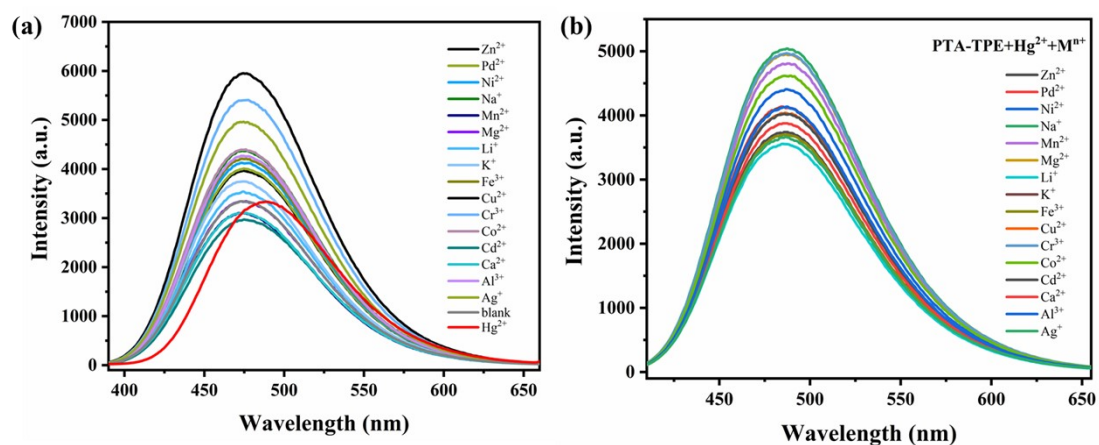

**Figure S3.** (A) Photoluminescence spectra of PTA-PTE (10  $\mu\text{M}$ ) in the presence of  $\text{Hg}^{2+}$  in PBS (pH 5.0). (B) Photoluminescence spectra of PTA-PTE (10  $\mu\text{M}$ ) in the presence of  $\text{Hg}^{2+}$  and various metal ions in PBS (pH 5.0).

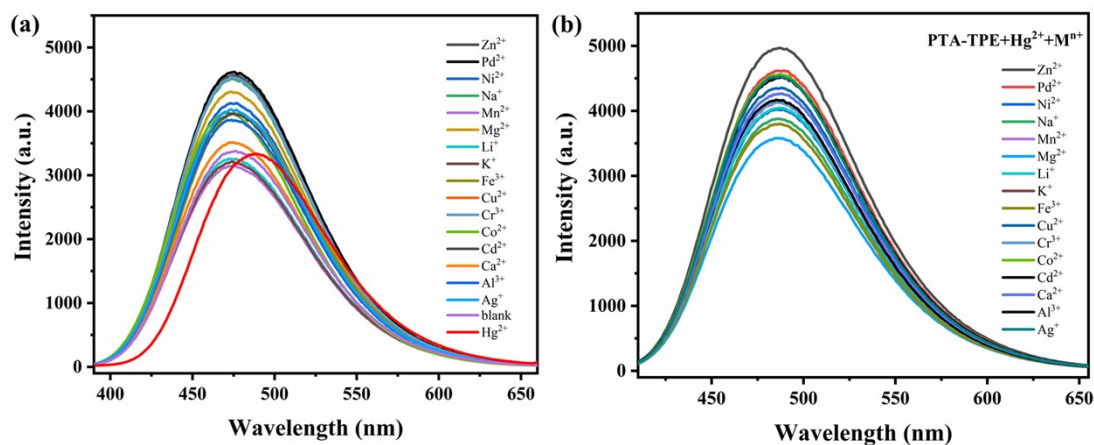

**Figure S4.** (A) Photoluminescence spectra of PTA-PTE (10  $\mu\text{M}$ ) in the presence of  $\text{Hg}^{2+}$  in PBS (pH 9.0). (B) Photoluminescence spectra of PTA-PTE (10  $\mu\text{M}$ ) in the presence of  $\text{Hg}^{2+}$  and various metal ions in PBS (pH 9.0).

**Table S1.** Comparison between various sensing parameters of thioacetal based detection systems.

| Probes                                                                              | Media                                              | Response time | Detection limit | Ref. |
|-------------------------------------------------------------------------------------|----------------------------------------------------|---------------|-----------------|------|
| 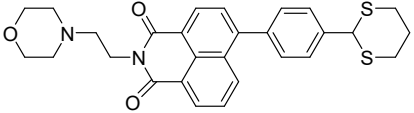   | ACN/H <sub>2</sub> O<br>(8:2)                      | 10 s          | 3.3 nM          | S1   |
|    | EtOH/H <sub>2</sub> O<br>(2:8, v/v;<br>pH7.4)      | 10 min        | 40 nM           | S2   |
|    | DMSO/H <sub>2</sub> O<br>(3:2,)                    | < 1 min       | 8.2 nM          | S3   |
|   | 99% PBS<br>buffer                                  | 15 min        | 19.3nM          | S4   |
|  | EtOH/H <sub>2</sub> O<br>(1/1, v/v)                | 5 min         | 18.7 nM         | S5   |
|  | EtOH/H <sub>2</sub> O<br>(1/1, v/v)                | 5 min         | 20.7 nM         | S5   |
|  | DMSO/H <sub>2</sub> O<br>(1:3, v/v)                | < 1 min       | 12.5 nM         | S6   |
|  | DMF/PBS<br>buffer (10<br>mM, pH 7.4,<br>5: 5, v/v) | 15 min        | 297nM           | S7   |

|                                                                                     |                                                     |        |         |     |
|-------------------------------------------------------------------------------------|-----------------------------------------------------|--------|---------|-----|
| 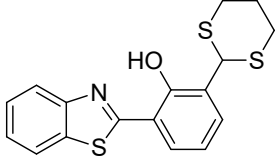   | CH <sub>3</sub> CN/H <sub>2</sub> O<br>(1:1,v/v)    | 15 min | 200 nM  | S8  |
|    | PBS (2 mM<br>Triton X-<br>100)                      | ~1 min | 1.16 nM | S9  |
|    | H <sub>2</sub> O                                    | -      | 72.7 nM | S10 |
|   | HEPES<br>buffer/CH <sub>3</sub> C<br>N (4 : 1, v/v) | -      | 0.9 nM  | S11 |
|  | THF/H <sub>2</sub> O<br>(f <sub>w</sub> = 5%)       | -      | 205 nM  | S12 |
|  | CH <sub>3</sub> CN/H <sub>2</sub> O<br>(1:1,v/v)    | 30 s   | 18 nM   | S13 |
|  | HEPES<br>buffer (10<br>mM, pH 7.4)                  | 5 min  | 320 nM  | S14 |
|  | THF                                                 | 6 min  | 800 nM  | S15 |
|  | EtOH/H <sub>2</sub> O<br>(1/1, v/v)                 | 1 min  | 10.3 nM | S16 |

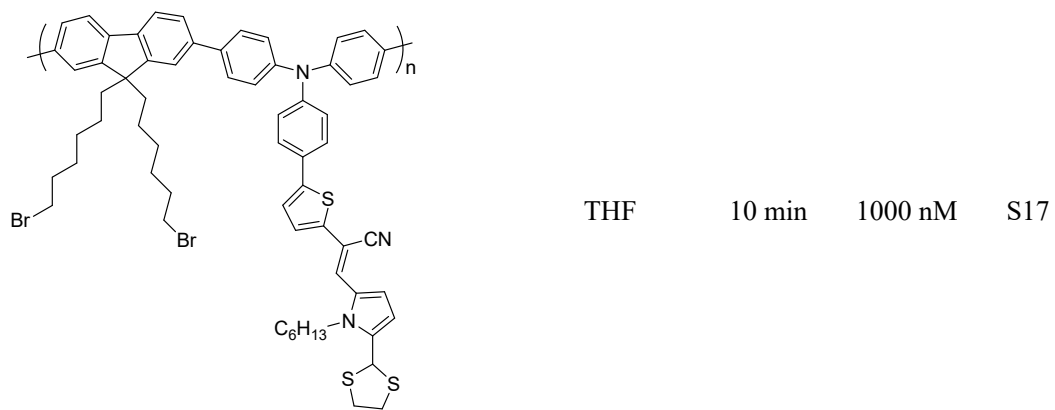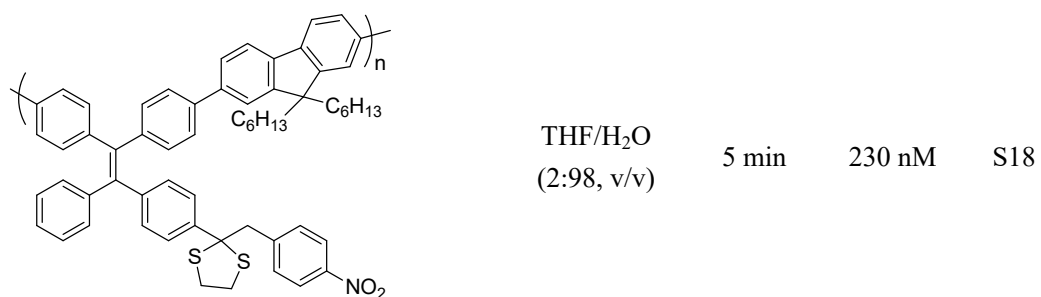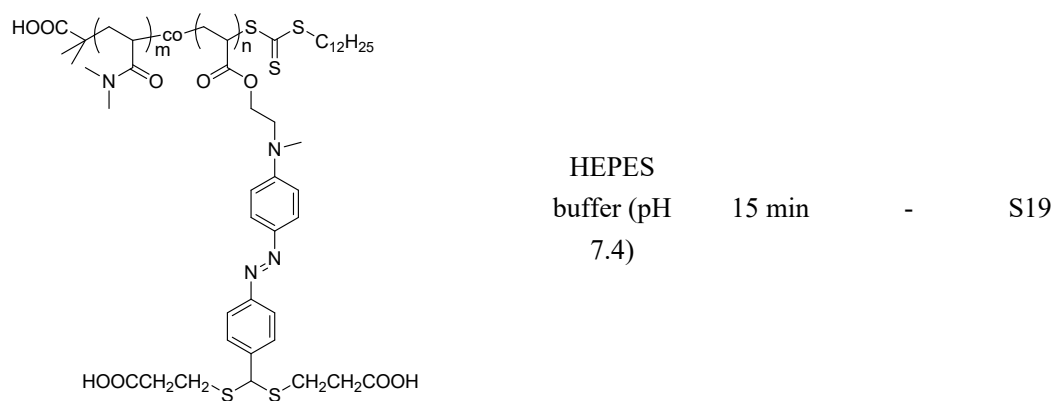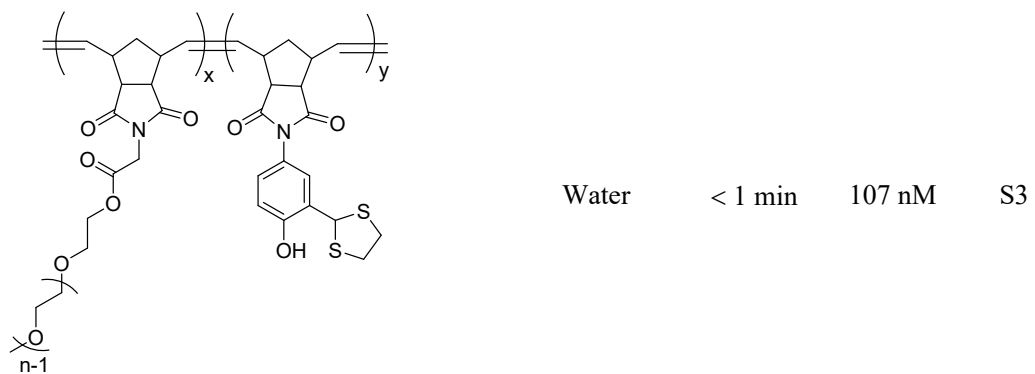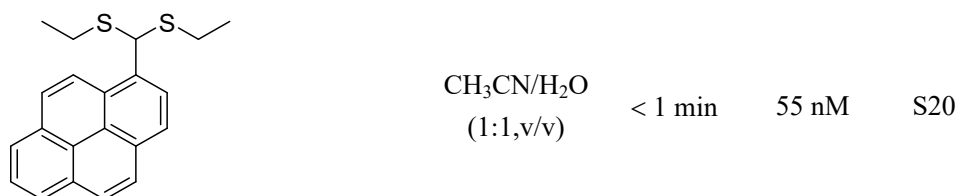

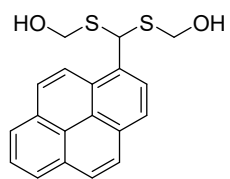

PBS buffer    30 min    1.74 nM    S21

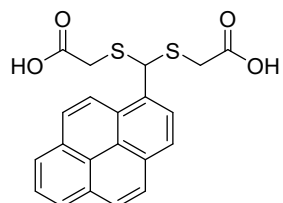

PBS buffer    30 min    1.53 nM    S21

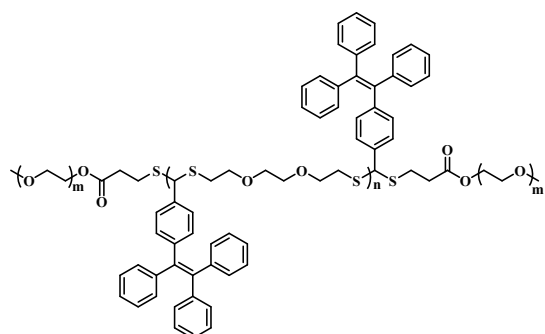

Water    < 1 min    10.81 nM    This work

---



**Table S2.** Comparative table of various Hg<sup>2+</sup>-specific polymer receptors with the present system.

| Materials                               | Adsorption time | Detection limit | Detection specificity                            | Removal Rate (%) | Ref.      |
|-----------------------------------------|-----------------|-----------------|--------------------------------------------------|------------------|-----------|
| Tryptophan-fluorescent polymer          | /               | 1.5 nM          | Hg <sup>2+</sup> & HSO <sub>4</sub> <sup>-</sup> | 93.5             | S22       |
| Cysteamine-functionalized hydrogel      | 3 h             | 0.3 nM          | Hg <sup>2+</sup>                                 | 90.7             | S23       |
| Thiol-amine functionalized polymer      | 0.5 h           | /               | Hg <sup>2+</sup>                                 | /                | S24       |
| Fluorescence probe on mesoporous silica | 3 h             | 0.19 μM         | Hg <sup>2+</sup> & Cu <sup>2+</sup>              | 96.3             | S25       |
| AIE fluorescent polymer                 | 12 h            | 0.30 μM         | Hg <sup>2+</sup>                                 | 90.0             | S26       |
| AIE thioacetal polymer                  | 0.5 h           | 10.81 nM        | Hg <sup>2+</sup>                                 | 80.6             | This work |

## References

- S1. D. Jothi, S. K. Iyer, *Inorg. Chem. Commun.* **2022**, *143*, 109735.
- S2. M. Tian, C. Wang, Q. Ma, Y. Bai, J. Sun, C. Ding, *ACS Omega* **2020**, *5*, 18176-18184.
- S3. T. Samanta, N. Das, D. Patra, P. Kumar, B. Sharmistha, R. Shunmugam, *ACS Sustain. Chem. Eng.* **2021**, *9*, 5196-5203..
- S4. Z. Wang, Y. Zhang, J. Yin, Y. Yang, H. Luo, J. Song, X. Xu, S. Wang, *ACS Sustain. Chem. Eng.* **2020**, *8*, 12348-12359.

- S5. C. Wang, L. Wang, S. Fang, D. Qin, J. Zhou, G. Yang, S. Jin, H. Duan, *Res. Chem. Intermediat.* **2019**, *45*, 2045-2063.
- S6. J. Wang, Q. Niu, T. Hu, T. Li, T. J. Wei, *Photochem. Photobiol. A Chem.* **2019**, *384*, 112036.
- S7. S. C. Pei, C. Z. Li, X. Y. Pei, W. H. Zeng, Y. Y. Zhang, K. X. Jiang, X. Huang, X. L. Liao, Chen, *J. Spectrochim. Acta A* **2023**, *285*, 121886.
- S8. I. J. Chang, K. S. Hwang, S. K. Chang, Selective Hg<sup>2+</sup> signaling via dithiane to aldehyde conversion of an ESIPT fluorophore. *Dyes Pigments* **2017**, *137*, 69-74.
- S9. Y. Gao, N. Yi, Z. Ou, Z. Li, T. Ma, H. Jia, W. Xing, G. Yang, Y. Li, *Sensor. Actuat. B: Chem.* **2018**, *267*, 136-144.
- S10. Q. W. Xu, C. Wang, Z. B. Sun, C. H. Zhao, *Org. Biomol. Chem.* **2015**, *13*, 3032-3039.
- S11. S. Saha, H. Agarwalla, H. Gupta, M. Baidya, E. Suresh, S. K. Ghosh, Das, *Dalton Trans.* **2013**, *42*, 15097–15105.
- S12. Pan, J.; Ma, J.; Liu, L.; Li, D.; Huo, Y.; Liu, H. *J. Photochem. Photobiol. A Chem.* **2021**, *416*, 113322.
- S13. Z. Yu, Z. Tian, Z. Li, Z. Luo, Y. Li, Y. Li, J. Ren, *Sensor. Actuat. B: Chem.* **2016**, *223*, 172-177.
- S14. Y. Wang, X. Hou, Z. Li, C. Liu, S. Hu, C. Li, Z. Xu, Y. Wang, *Dyes Pigments* **2020**, *173*, 107951.
- S15. J. Ding, H. Li, C. Wang, J. Yang, Y. Xie, Q. Peng, Q. Li, Z. Li, *ACS Appl. Mater. Inter.* **2015**, *7*, 11369-11376.
- S16. L. Lan, Q. Niu, T. Li, *Anal. Chim. Acta* **2018**, *1023*, 105-114.
- S17. J. Ding, H. Li, Y. Xie, Q. Peng, Q. Li, Z. Li, *Polym. Chem.* **2017**, *8*, 2221-2226.
- S18. Y. Shan, W. Yao, Z. Liang, L. Zhu, S. Yang, Z. Ruan, *Dyes Pigments* **2018**, *156*, 1-7.

- S19. A. Balamurugan, H. I. Lee, *Macromolecules* **2015**, *48*, 1048-1054.
- S20. Y. Y. Liu, S. Naha, N. Thirumalaivasan, S. Velmathi, S. P. Wu, *Sensor. Actuat. B: Chem.* **2018**, *277*, 673-678.
- S21. Y. Gao, T. Ma, Z. Ou, W. Cai, G. Yang, Y. Li, M. Xu, Q. Li, *Talanta* **2018**, *178*, 663-669.
- S22. N. Choudhury, B. Saha, B. Ruidas and P. De, *ACS Appl. Polym. Mater.* 2019, *1*, 461-471.
- S23. M. Bansal, B. Ram, G. S. Chauhan and A. Kaushik, *Int J Biol Macromol.* 2018, *112*, 728-736.
- S24. S. Chatterjee, H. Gohil, I. Raval, S. Chatterjee and A. R. Paital, *Small* **2019**, *15*, 1804749.
- S25. D. Dai, Z. Li, J. Yang, C. Wang, J.-R. Wu, Y. Wang, D. Zhang and Y.-W. Yang, *J. Am. Chem. Soc* **2019**, *141*, 4756-4763.
- S26. B. Liu, F. Zhao, Y. Qiu, W. Liu and Z. Wu, *J Mater Chem C* **2023**, *11*, 1499-1508.
